# Supplementary material for: Determinants of adolescents’ Health-Related Quality of Life and psychological distress during the COVID-19 pandemic
Source: PubMed Central journal article supplement (PMC9371327; doi:10.1371/journal.pone.0272925), 2022-08-11
Supplement: pone.0272925.s001.pdf [file pone.0272925.s001.pdf]

**Table S1.** Risk factors for adolescents' self- and parent-reported low Health-Related Quality of Life (HRQoL), minimally and fully adjusted models. N=225

|                                                         | Adolescent-reported HRQoL (KIDSCREEN-10) |                         | Parent-reported HRQoL (KINDL®) |                         |
|---------------------------------------------------------|------------------------------------------|-------------------------|--------------------------------|-------------------------|
|                                                         | Low HRQoL (aOR [95%CI])                  |                         | Low HRQoL (aOR [95%CI])        |                         |
|                                                         | Minimal model <sup>1,2</sup>             | Full model <sup>3</sup> | Minimal model <sup>1,2</sup>   | Full model <sup>3</sup> |
| <b>Age of the adolescent (years)<sup>1</sup></b>        | 0.75 (0.54 -1.01)*                       | 0.83 (0.54-0.97)*       | 0.94 (0.67 - 1.34)             | 0.95 (0.63-1.41)        |
| <b>Age of the parent (years)<sup>1</sup></b>            | 1.02 (0.93-1.10)                         | 1.02 (0.89-1.12)        | 1.01 (0.93 - 1.1)              | 1.02 (0.94-1.10)        |
| <b>Sex of the adolescent<sup>1</sup></b>                |                                          |                         |                                |                         |
| Boy                                                     | 1                                        | 1                       |                                | 1                       |
| Girl                                                    | 1.45 (0.76-2.76)                         | 1.10 (0.59-2.22)        | 3.92 (1.59 - 9.69)**           | 4.31 (1.63-11.10)**     |
| <b>Self-perceived mood of the parent<sup>2</sup></b>    |                                          |                         |                                |                         |
| Good                                                    | 1                                        | 1                       |                                | 1                       |
| Average to poor                                         | 1.73 (0.71- 4.21)                        | 1.30 (0.46-5.56)        | 1.59 (0.55 - 4.66)             | 1.63 (0.51-5.26)        |
| <b>Financial situation of the household<sup>1</sup></b> |                                          |                         |                                |                         |
| Good                                                    | 1                                        | 1                       |                                | 1                       |
| Average to poor                                         | 1.75 (0.72-4.07)                         | 2.30 (0.85-6.23)        | 1.56 (0.59 - 4.13)             | 1.36 (0.56-5.65)        |
| No answer                                               | 0.64 (0.04- 7.04)                        | 0.53 (0.07-5.27)        | 0.49 (0.06 - 3.96)             | 0.67 (0.07-6.67)        |
| <b>Household size (individuals)<sup>1</sup></b>         | 1.10 (0.72-1.67)                         | 1.52 (0.79-2.66)        | 1.12 (0.79 - 1.59)             | 1.20 (0.79-1.78)        |
| <b>Household density<sup>1</sup></b>                    |                                          |                         |                                |                         |
| Non-crowded                                             | 1                                        | 1                       |                                | 1                       |
| Crowded                                                 | 2.39 (0.75-7.59)                         | 2.08 (0.48-6.70)        | 2.68 (0.81 - 8.85)             | 2.05 (0.64-6.61)        |
| <b>Change in social media habits<sup>1</sup></b>        |                                          |                         |                                |                         |
| Same or less                                            | 1                                        | 1                       | 1                              | 1                       |
| More                                                    | 1.53 (0.82-2.88)                         | 1.60 (0.92-3.70)        | 0.81 (0.35 - 1.87)             | 0.83 (0.62-1.45)        |
| <b>Screen time (hours)<sup>1</sup></b>                  | 0.97 (0.83-1.14)*                        | 0.89 (0.79-0.98)*       | 0.94 (0.75 - 1.19)             | 0.95 (0.82-1.06)        |
| <b>Parent anti-SARS-CoV-2 serology<sup>2</sup></b>      |                                          |                         |                                |                         |
| Negative                                                | 1                                        | 1                       | 1                              | 1                       |
| Positive                                                | 2.60 (1.05-9.30)*                        | 3.33 (1.20-9.12)*       | 2.29 (0.91 - 5.73)             | 2.01 (0.69-6.34)        |
| <b>Adolescent anti-SARS-CoV-2 serology<sup>2</sup></b>  |                                          |                         |                                |                         |
| Negative                                                | 1                                        | 1                       | 1                              | 1                       |
| Positive                                                | 1.22 (0.42 -3.57)                        | 1.08 (0.57-2.27)        | 1.84 (0.72 - 4.74)             | 1.38 (0.44-4.03)        |
| <b>Parents' marital status<sup>1</sup></b>              |                                          |                         |                                |                         |
| Married or in couple                                    | 1                                        | 1                       | 1                              | 1                       |
| Divorced, separated, single or widowed                  | 0.97 (0.34-3.01)                         | 0.84 (0.27-2.20)        | 0.77 (0.26- 2.78)              | 0.57 (0.16- 2.13)       |

Results are adjusted odds ratios (aOR) and 95% confidence intervals (CI) from multivariable generalized estimating equations. aOR of continuous variables applicable for each additional unit.

\* indicates P < 0.05; \*\* indicates P < 0.01

<sup>1</sup> Minimal model adjusted for age and sex; <sup>2</sup> Minimal model adjusted for age, sex, financial situation and household density;

<sup>3</sup> Full model adjusted for all covariates in the first column
