# Supplementary material for: Determinants of adolescents’ Health-Related Quality of Life and psychological distress during the COVID-19 pandemic
Source: PubMed Central journal article supplement (PMC9371327; doi:10.1371/journal.pone.0272925), 2022-08-11
Supplement: pone.0272925.s002.pdf [file pone.0272925.s002.pdf]

**Table S2.** Risk factors for adolescents' self-reported loneliness and sadness, and parent-reported low emotional well-being, minimally and fully adjusted models. (N=225)

|                                                         | Self-reported sadness        |                         | Self-reported loneliness     |                         | Parent-reported low emotional well-being (KINDL®) |                         |
|---------------------------------------------------------|------------------------------|-------------------------|------------------------------|-------------------------|---------------------------------------------------|-------------------------|
|                                                         | Sadness (aOR [95%CI])        |                         | Loneliness (aOR [95%CI])     |                         | Low emotional well-being (aOR [95%CI])            |                         |
|                                                         | Minimal model <sup>1,2</sup> | Full model <sup>3</sup> | Minimal model <sup>1,2</sup> | Full model <sup>3</sup> | Minimal model <sup>1,2</sup>                      | Full model <sup>3</sup> |
| <b>Age of the adolescent (years)<sup>1</sup></b>        | 1.02 (0.79 - 1.31)           | 0.96 (0.72-1.13)        | 1.11 (0.84 - 1.46)           | 1.01 (0.80-1.23)        | 0.87 (0.66-1.16)                                  | 0.84 (0.62-1.17)        |
| <b>Age of the parent (years)<sup>1</sup></b>            | 1.06 (1.01 - 1.13)*          | 1.06 (1.00-1.13)*       | 1.04 (0.98 - 1.11)           | 1.04 (0.97-1.12)        | 1.08 (1.01-1.17)                                  | 1.10 (0.97-1.22)        |
| <b>Sex of the adolescent<sup>1</sup></b>                |                              |                         |                              |                         |                                                   |                         |
| Boy                                                     |                              | 1                       |                              | 1                       |                                                   | 1                       |
| Girl                                                    | 2.75 (1.61 - 4.83)**         | 3.20 (1.67-6.16)**      | 3.51 (1.79 - 6.91)**         | 4.10 (1.92-8.78)**      | 2.49 (1.23 -5.04)*                                | 2.73 (1.22-6.06)*       |
| <b>Self-perceived mood of the parent<sup>2</sup></b>    |                              |                         |                              |                         |                                                   |                         |
| Good                                                    |                              | 1                       |                              | 1                       |                                                   | 1                       |
| Average to poor                                         | 2.99 (1.31 - 6.82)*          | 2.62 (1.10-6.23)*       | 1.77 (0.71 - 4.44)           | 1.68 (0.71-3.98)        | 0.91 (0.33-2.51)                                  | 0.94 (0.39-2.30)        |
| <b>Financial situation of the household<sup>1</sup></b> |                              |                         |                              |                         |                                                   |                         |
| Good                                                    |                              | 1                       |                              | 1                       |                                                   | 1                       |
| Average to poor                                         | 2.31 (1.11 - 4.81)*          | 2.31 (1.01 - 6.10)*     | 1.98 (0.84 - 4.46)           | 1.98 (0.68-4.63)        | 2.16 (0.98-6.20)                                  | 2.37 (0.98-7.38)*       |
| No answer                                               | 0.67 (0.2 - 2.29)            | 0.85 (0.30-2.91)        | 1.01 (0.21 - 3.8)            | 1.41 (0.36-5.50)        | 0.99 (0.20-3.21)                                  | 0.98 (0.29-4.76)        |
| <b>Household size (individuals)<sup>1</sup></b>         | 1.01 (0.79 - 1.29)           | 1.15 (0.97-1.48)        | 1.03 (0.77 - 1.38)           | 1.17 (0.67-1.59)        | 0.79 (0.53-1.17)                                  | 0.73 (0.39-1.21)        |
| <b>Household density<sup>1</sup></b>                    |                              |                         |                              |                         |                                                   |                         |
| Non-crowded                                             |                              | 1                       |                              | 1                       |                                                   | 1                       |
| Crowded                                                 | 1.97 (0.74 - 5.25)           | 1.60 (0.58-4.77)        | 1.03 (0.32 - 3.32)           | 0.99 (0.74-1.65)        | 3.03 (1.20-7.65)*                                 | 3.12 (1.10-9.37)*       |
| <b>Change in social media habits<sup>1</sup></b>        |                              |                         |                              |                         |                                                   |                         |
| Same or less                                            |                              | 1                       |                              | 1                       |                                                   | 1                       |
| More                                                    | 2.26 (1.26 - 4.04)*          | 2.07 (1.08-3.97)*       | 1.92 (0.99 - 3.7)            | 1.88 (0.96-3.90)        | 1.41 (0.57-3.48)                                  | 1.57 (0.67-3.40)        |
| <b>Screen time (hours)<sup>1</sup></b>                  | 1.09 (0.94 - 1.27)           | 1.04 (0.91-1.27)        | 1.08 (0.91 - 1.28)           | 1.06 (0.87-1.27)        | 0.95 (0.72-1.08)                                  | 0.98 (0.71-1.15)        |
| <b>Parent anti-SARS-CoV-2 serology<sup>2</sup></b>      |                              |                         |                              |                         |                                                   |                         |
| Negative                                                |                              | 1                       |                              | 1                       |                                                   | 1                       |
| Positive                                                | 2.19 (1.10 - 4.35)*          | 2.55 (1.14-5.67)*       | 1.52 (0.60 - 2.92)           | 2.05 (0.84-5.01)        | 0.94 (0.38-2.46)                                  | 0.67 (0.23-1.98)        |
| <b>Adolescent anti-SARS-CoV-2 serology<sup>2</sup></b>  |                              |                         |                              |                         |                                                   |                         |
| Negative                                                |                              | 1                       |                              | 1                       |                                                   | 1                       |
| Positive                                                | 0.87 (0.43 - 1.79)           | 0.54 (0.22-1.32)        | 0.30 (0.11 - 0.85)**         | 0.19 (0.05-0.70)**      | 1.20 (0.50-2.86)                                  | 1.59 (0.57-4.38)        |
| <b>Parents' marital status<sup>1</sup></b>              |                              |                         |                              |                         |                                                   |                         |
| Married or in couple                                    | 1                            | 1                       | 1                            | 1                       | 1                                                 | 1                       |
| Divorced, separated, single or widowed                  | 1.20 (0.55-2.01)             | 1.17 (0.61-2.20)        | 1.86 (0.86-4.03)             | 1.36 (0.58-3.21)        | 0.95 (0.53-2.93)                                  | 0.84 (0.27-2.20)        |

Results are adjusted odds ratios (aOR) and 95% confidence intervals (CI) from multivariable generalized estimating equations. aOR of continuous variables applicable for each additional unit.

\* indicates P < 0.05; \*\* indicates P < 0.01

<sup>1</sup> Minimal model adjusted for age and sex; <sup>2</sup> Minimal model adjusted for age, sex, financial situation and household density;

<sup>3</sup> Full model adjusted for all covariates in the first column
